# Supplementary material for: LncRNA H19 is a major mediator of doxorubicin chemoresistance in breast cancer cells through a cullin4A-MDR1 pathway
Source: PubMed Central journal article supplement (PMC5696158; doi:10.18632/oncotarget.21121), 2017-09-21
Supplement: oncotarget-08-91990-s001.pdf [file oncotarget-08-91990-s001.pdf]

## **LncRNA H19 is a major mediator of doxorubicin chemoresistance in breast cancer cells through a cullin4A-MDR1 pathway**

### **SUPPLEMENTARY MATERIALS**

**Supplementary Table 1: The differentially genes in MCF-7/Dox1600 vs parallel control MCF-7/Con1600 and MCF-7/DOX/shH19 VS MCF-7/DOX/NC. See Supplementary\_Table\_1**
